# Supplementary material
Source: PubMed Central journal article supplement (PMC3210475)
Supplement: NIHMS318417-supplement-02.pdf [file NIHMS318417-supplement-02.pdf]

**Supplemental Table 1A Details of DHS and CHIP measurements at endogenous GREs.**

| Internal Locus ID #        | Gene Name description | Unique Internal locus description | DHS peak seq tag count - dex | DHS peak seq tag count + dex | DHS ratio DHS ratio +dex/-dex | GR CHIP + dex | GR CHIP + dex + E2 | GR CHIP Ratio +dex+E2/+dex | ERpBox CHIP + E2 | ERpBox CHIP + dex + E2 | ERpBox CHIP Ratio +dex+E2/+E2 |
|----------------------------|-----------------------|-----------------------------------|------------------------------|------------------------------|-------------------------------|---------------|--------------------|----------------------------|------------------|------------------------|-------------------------------|
| <b>Preprogrammed sites</b> |                       |                                   |                              |                              |                               |               |                    |                            |                  |                        |                               |
| 1                          | Slc5a5                | chr8_73809380                     | 462                          | 475                          | 1.03                          | 0.0001243     | 0.00023276         | 1.872566193                | 0.00093363       | 0.00069478             | 0.74                          |
| 2                          | ND                    | chr7_112937750                    | 34                           | 37                           | 1.09                          | 0.0019598     | 0.00167482         | 0.854591125                | 0.00129272       | 0.00128267             | 0.99                          |
| 3                          | Spp2/Glrp1            | chr1_90306468                     | 107                          | 119                          | 1.11                          | 0.00152132    | 0.0014933          | 0.98158272                 | 0.00372546       | 0.00272714             | 0.73                          |
| 4                          | Tbl1xr1               | chr3_22143881                     | 114                          | 155                          | 1.36                          | 0.00138335    | 0.000967           | 0.699023533                | 0.00076966       | 0.00112488             | 1.46                          |
| 5                          | ND                    | chr6_28982040                     | 41                           | 66                           | 1.61                          | 0.00345054    | 0.00292163         | 0.846717549                | 0.00169957       | 0.00202999             | 1.19                          |
| <b>de novo sites</b>       |                       |                                   |                              |                              |                               |               |                    |                            |                  |                        |                               |
| 6                          | Sys1/Sdc4             | chr2_164146892                    | 45                           | 494                          | 10.98                         | 0.00959871    | 0.00992899         | 1.034408297                | 0.00789394       | 0.00941958             | 1.19                          |
| 7                          | Tns1 Intron 4         | chr1_73948020                     | 2                            | 42                           | 21.00                         | 0.00454624    | 0.0035061          | 0.771210164                | 0.00026992       | 0.00210237             | 7.79                          |
| 8                          | Slc44a3 50kb Pr       | chr3_121597000                    | 9                            | 224                          | 24.89                         | 0.00646772    | 0.00515919         | 0.797682902                | 0.0013308        | 0.00255533             | 1.92                          |
| 9                          | Tsku                  | chr7_98267828                     | 12                           | 347                          | 28.92                         | 0.01080488    | 0.01104406         | 1.022136347                | 0.00491957       | 0.00935684             | 1.90                          |
| 10                         | Rlbp11                | chr4_9187915                      | 1                            | 43                           | 43.00                         | 0.00186196    | 0.0014597          | 0.783958934                | 0.00049665       | 0.00150721             | 3.03                          |
| 11                         | Lcn2                  | chr2_32210200                     | 1                            | 55                           | 55.00                         | 0.00273052    | 0.00178083         | 0.6521947                  | 0.00062448       | 0.00204808             | 3.28                          |
| 12                         | Ggta1 Intron 1        | chr2_35262340                     | 1                            | 57                           | 57.00                         | 0.00284432    | 0.00295558         | 1.039116842                | 0.00165691       | 0.00419515             | 2.53                          |
| 13                         | Cugbp2 alt pr1 Intr   | chr2_7160037                      | 1                            | 73                           | 73.00                         | 0.00102724    | 0.00125195         | 1.218755595                | 0.00036985       | 0.00075955             | 2.05                          |
| 14                         | Rpl29                 | chr9_106271900                    | 1                            | 92                           | 92.00                         | 0.00225594    | 0.00197216         | 0.874207234                | 0.00132128       | 0.00162055             | 1.23                          |
| 15                         | Slc25a33              | chr4_148657510                    | 2                            | 199                          | 99.50                         | 0.00920885    | 0.00780574         | 0.847634561                | 0.00399993       | 0.00726651             | 1.82                          |

**Primers for qPCR analysis of CHIP experiments**

| internal locus ID num | unique internal locus description | primer sequence                                                      | primer direction | CHIP amplicon genomic coordinates (Mouse Feb 2006 Build) |
|-----------------------|-----------------------------------|----------------------------------------------------------------------|------------------|----------------------------------------------------------|
| 1                     | chr8_73809380                     | CCCACCTGGCTTGGGATTGTGTCAGTA<br>TCCCGAGGTGCCCAACTTGA                  | For<br>Rev       | chr8:73809333+73809520                                   |
| 2                     | chr7_112937750                    | GCTTTCTCCCCGTCTCCAGGCTGACATGTA<br>CCCAAACCCGTCAATTTAGGAAAGCTGTTG     | For<br>Rev       | chr7:112937902+112938059                                 |
| 3                     | chr1_90306468                     | TTGCAGAAATGTCAAGCAACATCTTCAGG<br>GGAGCCCCAGTTAATGACTGACTTG           | For<br>Rev       | chr1:90306579+90306741                                   |
| 4                     | chr3_22143881                     | ATGCCCTCCTTAAATCAGTTCTCTGTG<br>TGAAATGCAGTCATGAATACTGGGG             | For<br>Rev       | chr3:22143981+22144156                                   |
| 5                     | chr6_28982040                     | CGAATTCTGATACCTGACACTAGGCCACA<br>TGTTTCAACTACCCTGTGCCAAGAATCGA       | For<br>Rev       | chr6:28982390+28982530                                   |
| 6                     | chr2_164146892                    | TGTCCTTATATGCTTGATGTTAGCCCC<br>TCAAACCTTGGGTGAGGCGAGAAG              | For<br>Rev       | chr2:164147064+164147193                                 |
| 7                     | chr1_73948020                     | CCTGCCTCATGGTCCCTAAACCTT<br>GGTCATCTGTGCTAAGCTGCTGCC                 | For<br>Rev       | chr1:73947956+73948057                                   |
| 8                     | chr3_121597000                    | ATCCCCAACCCAGCCGTGATGTCTA<br>GCTCAGAGCCATAGGCTTAGAGCCAAC             | For<br>Rev       | chr3:121597010+121597136                                 |
| 9                     | chr7_98267828                     | TTCAACCTCACTTCAAAGAAATGGATG<br>CATTGATTTGAGACATGGACAGGTTCC           | For<br>Rev       | chr7:98267760+98267908                                   |
| 10                    | chr4_9187915                      | TCCTGTAAAGGGACTTACTCATTGTATGTTTATG<br>CATAATCCATAACTGTCTGTCCCAAGAACA | For<br>Rev       | chr4:9187989+9188104                                     |
| 11                    | chr2_32210200 Lct                 | TCACCTGTGCCAGGACCAA<br>TGGGGAAGGGTGAGCAAGCT                          | For<br>Rev       | chr2:32210236-32210338                                   |
| 12                    | chr2_35262340                     | AACCCATAAAGTACTTAGGGAACAGCAGCT<br>CAACACTGCAGGCTCTCCTGTAGATGTAG      | For<br>Rev       | chr2:35262280+35262404                                   |
| 13                    | chr2_7160037                      | TAAGTGTACTACCATTGAAGGAATGATAAGAGGG<br>CAAACAACTCTGTGCTTCAATATTTCCAT  | For<br>Rev       | chr2:7160050+7160248                                     |
| 14                    | chr9_106271900                    | CGTCTTGCCTTTGAAGACATTGGACTAA<br>TTACCAGGCCAGCTCATGTTACAGT            | For<br>Rev       | chr9:106271825+106271941                                 |
| 15                    | chr4_148657510                    | GAGTCTGACTCATTGTTTGGTTTTCCTC<br>CCCCACCCAGCAAACAAGATTT               | For<br>Rev       | chr4:148657472+148657557                                 |

**Supplemental Table 1B Additional examples: Assisted loading of ERpBox at endogenous GREs**

| Site # |            | DHS Site  | DHS Site  | DHS peak | DHS peak |           | ERpBox      |
|--------|------------|-----------|-----------|----------|----------|-----------|-------------|
|        |            | Start     | Stop      | seq tag  | seq tag  |           |             |
|        |            | Position  | Position  | count    | count    | DHS ratio | ChIP        |
|        | Chromosome |           |           | - dex    | + dex    | +dex/-dex | Ratio       |
|        |            |           |           |          |          |           | +dex+E2/+E2 |
| 1      | chr1       | 40378480  | 40378630  | 1        | 151      | 151.0     | 11.4        |
| 2      | chr1       | 162016140 | 162016290 | 3        | 108      | 36.0      | 3.6         |
| 3      | chr1       | 165400640 | 165400790 | 4        | 245      | 61.3      | 2.1         |
| 4      | chr1       | 194433820 | 194433970 | 5        | 173      | 34.6      | 9.1         |
| 5      | chr2       | 148804460 | 148804610 | 5        | 135      | 27.0      | 12.5        |
| 6      | chr2       | 167448760 | 167448910 | 9        | 257      | 28.6      | 6.7         |
| 7      | chr6       | 13011760  | 13011910  | 5        | 226      | 45.2      | 3.3         |
| 8      | chr6       | 38765040  | 38765190  | 5        | 100      | 20.0      | 6.3         |
| 9      | chr6       | 99141020  | 99141170  | 2        | 92       | 46.0      | 5.6         |
| 10     | chr7       | 114368900 | 114369050 | 1        | 66       | 66.0      | 3.9         |
| 11     | chr7       | 122838140 | 122838290 | 2        | 92       | 46.0      | 3.2         |
| 12     | chr7       | 128581280 | 128581430 | 4        | 99       | 24.8      | 3.3         |
| 13     | chr8       | 8401900   | 8402050   | 1        | 50       | 50.0      | 2.4         |
| 14     | chr8       | 123215100 | 123215250 | 2        | 134      | 67.0      | 6.0         |
| 15     | chr10      | 21694340  | 21694490  | 0        | 138      | Inf       | 11.9        |
| 16     | chr10      | 95203500  | 95203650  | 3        | 147      | 49.0      | 7.2         |
| 17     | chr11      | 50497260  | 50497410  | 2        | 117      | 58.5      | 3.9         |
| 18     | chr11      | 120818440 | 120818590 | 3        | 127      | 42.3      | 8.4         |
| 19     | chr13      | 20235980  | 20236130  | 1        | 77       | 77.0      | 2.5         |
| 20     | chr13      | 42585420  | 42585570  | 2        | 118      | 59.0      | 2.1         |
| 21     | chr13      | 79161940  | 79162090  | 1        | 50       | 50.0      | 3.3         |
| 22     | chr14      | 7103580   | 7103730   | 4        | 96       | 24.0      | 8.7         |
| 23     | chr15      | 37128860  | 37129010  | 1        | 50       | 50.0      | 3.6         |
| 24     | chr17      | 26240280  | 26240430  | 6        | 185      | 30.8      | 9.3         |
| 25     | chr18      | 66372000  | 66372150  | 1        | 133      | 133.0     | 7.5         |
| 26     | chrX       | 135859840 | 135859990 | 3        | 132      | 44.0      | 8.7         |

**Supplemental Table 1B Primers for qPCR analysis of ChIP experiments**

| Internal Locus ID # | Unique internal locus description | Primer sequence                                         | ChIP amplicon Primer direction | genomic coordinates Mouse Feb 2006 Build |
|---------------------|-----------------------------------|---------------------------------------------------------|--------------------------------|------------------------------------------|
| 1                   | chr1_40378446                     | GTCACCTCCCTTTCCAGTGAACCAT<br>GCGAAAGTTGCCAAATACAGAACAG  | For<br>Rev                     | chr1:40378446+40378568                   |
| 2                   | chr1_162016160                    | CCTTCACTCTGCAACCACACAAAA<br>TGGAGGGTTTGATTCTGACTCAGTG   | For<br>Rev                     | chr1:162016160+162016259                 |
| 3                   | chr1_165400589                    | GAAAAAATGTCCCTGGATTCTTCA<br>ATATCTGTGGTTGCCTGTCCAGGAC   | For<br>Rev                     | chr1:165400589+165400731                 |
| 4                   | chr1_194433844                    | AGTCTCCCAGGCACACAATGTTCT<br>CCACAGCAGCACAAAAGGTGTTATT   | For<br>Rev                     | chr1:194433844+194433944                 |
| 5                   | chr2_148804463                    | ATGTTTACAGTGTGTCCCTTCTGCC<br>AATATGCACAGTTGCTCCCATTGTT  | For<br>Rev                     | chr2:148804463+148804547                 |
| 6                   | chr2_167448768                    | CCCCAGGGTTGGTGCCTTCTAT<br>CCCAGATAGGGTGACAGCCACA        | For<br>Rev                     | chr2:167448768+167448874                 |
| 7                   | chr6_13011895                     | TGTTTTCTTTCTCCCTTCTACCC<br>GGAAGCTCAGGATACAGGAAACCAG    | For<br>Rev                     | chr6:13011895+13012032                   |
| 8                   | chr6_38765085                     | TTACTCATGGTATGCTCTCAAGCCC<br>GGTACTCTGGGTGTGTAAGCAACGT  | For<br>Rev                     | chr6:38765085+38765191                   |
| 9                   | chr6_99141032                     | CTTGCTCAACTAAGGGATGATGCA<br>TTGTCATGCTGACCACATCCATG     | For<br>Rev                     | chr6:99141032+99141146                   |
| 10                  | chr7_114369031                    | GACCATTTGTCATGGCTATTGCTGA<br>GGTGCCCAAGGATACAACCTAAGACC | For<br>Rev                     | chr7:114368852-114369221                 |
| 11                  | chr7_122838106                    | CTTGCTTTGTCAGAGGTGGGAAGA<br>GCAATGAGTTCAATTTCTGGTGTGTC  | For<br>Rev                     | chr7:122838106+122838251                 |
| 12                  | chr7_128581278                    | AAGTCAGGTGTCTTTGGCAAGGC<br>CAAACCAGTTAGGTTCAAAGGGCAT    | For<br>Rev                     | chr7:128581278+128581459                 |
| 13                  | chr8_8402017                      | TATAGAACACAAGCAAGCTGTGGC<br>AGCCACTCAGCACAAATGCAGTG     | For<br>Rev                     | chr8:8402017+8402101                     |
| 14                  | chr8_123215110                    | AATGACAATACCAGGACACAGTGCC<br>CAGTTGCCAGGTCGCACATTG      | For<br>Rev                     | chr8:123215110+123215258                 |
| 15                  | chr10_21694338                    | TCCTTTCTTCTGTGCTCTGTCCG<br>GCCTGTCTGCATTTATGCCTTCTAC    | For<br>Rev                     | chr10:21694338+21694456                  |
| 16                  | chr10_95203537                    | GCAGGAGGGAAAGGCATGACTT<br>CCCAAATGAGACTGCCAGGAA         | For<br>Rev                     | chr10:95203537+95203682                  |
| 17                  | chr11_50497316                    | CCTCCTGCATCTTTCAACACTGTC<br>ATCTGGCCTAGCTGGAGACACT      | For<br>Rev                     | chr11:50497316+50497438                  |
| 18                  | chr11_120818481                   | GGACCAGCGAACCTTGCTT<br>TGGTCTGGGTTGGCACAGTCTT           | For<br>Rev                     | chr11:120818481+120818575                |
| 19                  | chr13_20235879                    | AGCACTGTAGAGCACAGAACAGGCA<br>CCCAGTGTGTCCTGAGTCACTATT   | For<br>Rev                     | chr13:20235879-20236248                  |
| 20                  | chr13_42585368                    | AAAGGGGCGAGGAGTGGAATT<br>TTCTTTCTGGATGAGAACAGGCTG       | For<br>Rev                     | chr13:42585368+42585527                  |
| 21                  | chr13_79161815                    | TCATAAACAAACAGGCTGCAATGTG<br>TGGACTTGGCAAGGAATGTGGTT    | For<br>Rev                     | chr13:79161815+79161937                  |
| 22                  | chr14:7103601                     | ACCGTTATTTCACTTGGTGAGTGGC<br>TGCCTCATCAGTCTGACAGAACATG  | For<br>Rev                     | chr14:7103601+7103710                    |
| 23                  | chr15_37128871                    | GTCATTTCAAGGAGTTGTCTGTTC<br>CAGTCAACCCACAGTTCAAGGTA     | For<br>Rev                     | chr15:37128871+37128984                  |
| 24                  | chr17_26240311                    | GCAACTTGTCCAAGTCACTGTG<br>GGAGCACTGACCCCTAAAGATAAGC     | For<br>Rev                     | chr17:26240311+26240415                  |
| 25                  | chr18_66371979                    | ACTGAGCCAAGTTCAACACCTCTCA<br>CCGTGTTCTACTGGTGTAGGACTGG  | For<br>Rev                     | chr18:66371979+66372135                  |
| 26                  | chrX_135859793                    | ACCTTCTAGTCTGATCCCACAGG<br>GCAAACATTCTGAGTTGGTGAATC     | For<br>Rev                     | chrX:135859793+135859906                 |
